# Supplementary material for: Measuring the impact of methodological research: a framework and methods to identify evidence of impact
Source: PubMed Central journal article supplement (PMC4258950; doi:10.1186/1745-6215-15-464), 2014-11-27

# Journal types for Hub methodology papers 2009-2012

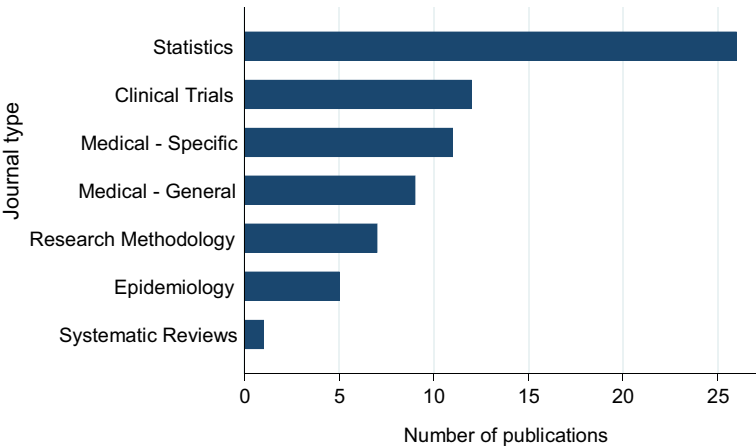

Supplement: 13063_2014_2328_MOESM4_ESM.pdf [file 13063_2014_2328_MOESM4_ESM.pdf]
